# Supplementary material for: Longitudinal changes in proportionate mortality due to COVID-19 by occupation in England and Wales
Source: PubMed Central journal article supplement (PMC10546610; doi:10.5271/sjweh.4048), 2022-10-29
Supplement: SJWEH-48-611-S001.pdf [file SJWEH-48-611-S001.pdf]

## Longitudinal changes in proportionate mortality due to COVID-19 by occupation in England and Wales<sup>1</sup>

by Mark Cherrie, PhD,<sup>2</sup> Sarah Rhodes, MSc, Jack Wilkinson, PhD, William Mueller, MSc, Vahe Nafilyan, PhD, Martie Van Tongeren, PhD, Neil Pearce, PhD

1. Supplementary Material
2. Correspondence to: Mark Cherrie, Institute of Occupational Medicine, Edinburgh, UK. [E-mail: mark.cherrie@iom-world.org]

S1: Occupational coding based on the SOC10 coding system

| Group                                         | SOC10 code | SOC Title                                                |
|-----------------------------------------------|------------|----------------------------------------------------------|
| Health associate professionals and associates | 2211       | Medical practitioners                                    |
| Health associate professionals and associates | 2212       | Psychologists                                            |
| Health associate professionals and associates | 2213       | Pharmacists                                              |
| Health associate professionals and associates | 2231       | Nurses                                                   |
| Health associate professionals and associates | 2232       | Midwives                                                 |
| Health associate professionals and associates | 2217       | Medical radiographers                                    |
| Health associate professionals and associates | 3213       | Paramedics                                               |
| Health associate professionals and associates | 2218       | Podiatrists                                              |
| Health associate professionals and associates | 3219       | Health associate professionals n.e.c.                    |
| Health associate professionals and associates | 3217       | Pharmaceutical technicians                               |
| Health associate professionals and associates | 3218       | Medical and dental technicians                           |
| Health associate professionals and associates | 1181       | Health services and public health managers and directors |
| Health associate professionals and associates | 1241       | Health care practice managers                            |
| Health associate professionals and associates | 2221       | Physiotherapists                                         |
| Health associate professionals and associates | 2219       | Health professionals n.e.c.                              |
| Health associate professionals and associates | 2222       | Occupational therapists                                  |
| Health associate professionals and associates | 2223       | Speech and language therapists                           |

|                                               |      |                                                                |
|-----------------------------------------------|------|----------------------------------------------------------------|
|                                               |      | Therapy professionals                                          |
| Health associate professionals and associates | 2229 | n.e.c.                                                         |
| Health associate professionals and associates | 2214 | Ophthalmic opticians                                           |
| Health associate professionals and associates | 2215 | Dental practitioners                                           |
| Health associate professionals and associates | 6143 | Dental nurses                                                  |
| Support staff                                 | 4211 | Medical secretaries                                            |
| Support staff                                 | 6141 | Nursing auxiliaries and assistants                             |
| Support staff                                 | 6142 | Ambulance staff (excluding paramedics)                         |
| Support staff                                 | 7114 | Pharmacy and other dispensing assistants                       |
| Support staff                                 | 9271 | Hospital porters                                               |
| Social care                                   | 1184 | Social services managers and directors                         |
| Social care                                   | 1242 | Residential, day and domiciliary care managers and proprietors |
| Social care                                   | 2442 | Social workers                                                 |
| Social care                                   | 2444 | Clergy                                                         |
| Social care                                   | 3231 | Youth and community workers                                    |
| Social care                                   | 3234 | Housing officers                                               |
| Social care                                   | 2449 | Welfare professionals n.e.c.                                   |
| Social care                                   | 3239 | Welfare and housing associate professionals n.e.c.             |
| Social care                                   | 6144 | Houseparents and residential wardens                           |
| Social care                                   | 6145 | Care workers and home carers                                   |
| Social care                                   | 6146 | Senior care workers                                            |
| Social care                                   | 6147 | Care escorts                                                   |

|                              |      |                                                                  |
|------------------------------|------|------------------------------------------------------------------|
| Social care                  | 6232 | Caretakers<br>Undertakers,<br>mortuary and<br>crematorium        |
| Social care                  | 6148 | assistants<br>Teaching and<br>Educational                        |
| Education                    | 231  | Professionals<br>Secondary<br>education<br>teaching              |
| Education                    | 2314 | professionals<br>Primary and<br>nursery<br>education<br>teaching |
| Education                    | 2315 | professionals<br>Special needs<br>education<br>teaching          |
| Education                    | 2316 | professionals<br>Nursery nurses                                  |
| Education                    | 6121 | and assistants<br>Teaching                                       |
| Education                    | 6125 | assistants<br>Shopkeepers<br>and proprietors<br>– wholesale and  |
| Food retail and distribution | 1254 | retail                                                           |
| Food retail and distribution | 5431 | Butchers<br>Bakers and flour                                     |
| Food retail and distribution | 5432 | confectioners<br>Fishmongers<br>and poultry                      |
| Food retail and distribution | 5433 | dressers<br>Sales and retail                                     |
| Food retail and distribution | 7111 | assistants<br>Retail cashiers<br>and check-out                   |
| Food retail and distribution | 7112 | operators                                                        |
| Food retail and distribution | 9251 | Shelf fillers<br>Elementary<br>sales<br>occupations              |
| Food retail and distribution | 9259 | n.e.c.<br>Managers and<br>directors in<br>storage and            |
| Food retail and distribution | 1162 | warehousing<br>Managers and                                      |
| Food retail and distribution | 1190 | directors in                                                     |

|                                     |      |                                                                                  |
|-------------------------------------|------|----------------------------------------------------------------------------------|
|                                     |      | retail and<br>wholesale<br>Food, drink and<br>tobacco process<br>operatives      |
| Food production                     | 8111 | Managers and<br>proprietors in<br>agriculture and<br>horticulture                |
| Food production                     | 1211 | Managers and<br>proprietors in<br>forestry, fishing<br>and related<br>services   |
| Food production                     | 1213 |                                                                                  |
| Food production                     | 5111 | Farmers<br>Horticultural<br>trades                                               |
| Food production                     | 5112 | Agricultural and<br>fishing trades                                               |
| Food production                     | 5119 | n.e.c.                                                                           |
| Food production                     | 9111 | Farm workers<br>Fishing and<br>other<br>elementary<br>agriculture<br>occupations |
| Food production                     | 9119 | n.e.c.                                                                           |
| Taxi and cab drivers and chauffeurs | 8214 | Taxi and cab<br>drivers and<br>chauffeurs                                        |
| Bus and coach drivers               | 8213 | Bus and coach<br>drivers                                                         |
| Van drivers                         | 8212 | Van drivers<br>Managers and<br>directors in<br>transport and<br>distribution     |
| Other transport workers             | 1161 | Train and tram<br>drivers                                                        |
| Other transport workers             | 8231 | Rail travel<br>assistants                                                        |
| Other transport workers             | 6215 | Large goods<br>vehicle drivers                                                   |
| Other transport workers             | 8211 | Rail transport<br>operatives                                                     |
| Other transport workers             | 8234 | Postal workers,<br>mail sorters,<br>messengers and<br>couriers                   |
| Other transport workers             | 9211 | Senior police<br>officers                                                        |
| Police and protective services      | 1172 |                                                                                  |

|                                |                                           |                                                                             |
|--------------------------------|-------------------------------------------|-----------------------------------------------------------------------------|
|                                |                                           | Senior officers<br>in fire,<br>ambulance,<br>prison and<br>related services |
| Police and protective services | 1173                                      | NCOs and other                                                              |
| Police and protective services | 3311                                      | ranks                                                                       |
| Police and protective services | 3312                                      | Police officers<br>(sergeant and<br>below)                                  |
| Police and protective services | 3313                                      | Fire service<br>officers (watch<br>manager and<br>below)                    |
| Police and protective services | 3314                                      | Prison service<br>officers (below<br>principal officer)                     |
| Police and protective services | 3319                                      | Protective<br>service<br>associate<br>professionals<br>n.e.c.               |
| Police and protective services | 2443                                      | Probation<br>officers                                                       |
| Sanitary workers               | 9231                                      | Window<br>cleaners                                                          |
| Sanitary workers               | 9232                                      | Street cleaners                                                             |
| Sanitary workers               | 9233                                      | Cleaners and<br>domestics                                                   |
| Sanitary workers               | 9235                                      | Refuse and<br>salvage<br>occupations                                        |
| Sanitary workers               | 9239                                      | Elementary<br>cleaning<br>occupations<br>n.e.c.                             |
|                                | All<br>others/not<br>in the list<br>above | All others/not in<br>the list above                                         |
| Non-essential                  |                                           |                                                                             |

---

S2: Odds of Covid-19 deaths compared with non-essential occupations for expanded occupational grouping

| <b>Occupational classification (SOC 10 code)</b>                                  | <b>Unadjusted MOR (95%CI)</b> | <b>Adjusted for age and sex (95%CI)</b> | <b>Adjusted for age , sex and deprivation (95% CI)</b> | <b>Adjusted for age, sex and region (95%CI)</b> | <b>Adjusted for age, sex, deprivation, region, urban/rural and population density</b> |
|-----------------------------------------------------------------------------------|-------------------------------|-----------------------------------------|--------------------------------------------------------|-------------------------------------------------|---------------------------------------------------------------------------------------|
| Administrative occupations (41)                                                   | 0.83 (0.73-0.93)              | 1.02 (0.9-1.15)                         | 0.99 (0.87-1.11)                                       | 0.95 (0.84-1.08)                                | 0.93 (0.82-1.05)                                                                      |
| Assemblers and construction operatives (81)                                       | 0.79 (0.66-0.94)              | 0.82 (0.69-0.98)                        | 0.76 (0.64-0.91)                                       | 0.79 (0.66-0.94)                                | 0.77 (0.65-0.92)                                                                      |
| Business and public service associate professionals (24)                          | 0.79 (0.69-0.91)              | 0.87 (0.76-1)                           | 0.86 (0.75-0.99)                                       | 0.85 (0.74-0.98)                                | 0.84 (0.73-0.97)                                                                      |
| Business, media and public service professionals (35)                             | 0.94 (0.81-1.08)              | 1.01 (0.88-1.17)                        | 1.01 (0.87-1.16)                                       | 0.93 (0.8-1.07)                                 | 0.91 (0.79-1.06)                                                                      |
| Caring personal service occupations (excluding care workers and home carers) (61) | 0.8 (0.66-0.95)               | 1.16 (0.96-1.39)                        | 1.12 (0.93-1.35)                                       | 1.06 (0.88-1.28)                                | 1.05 (0.87-1.27)                                                                      |
| Culture, media and sports occupations (34)                                        | 0.52 (0.43-0.63)              | 0.58 (0.48-0.7)                         | 0.57 (0.47-0.69)                                       | 0.52 (0.43-0.63)                                | 0.51 (0.42-0.62)                                                                      |
| Customer service occupations (72)                                                 | 0.99 (0.81-1.23)              | 1.28 (1.03-1.58)                        | 1.22 (0.98-1.51)                                       | 1.24 (1-1.53)                                   | 1.2 (0.97-1.49)                                                                       |
| Elementary trades and related occupations (91)                                    | 0.75 (0.66-0.86)              | 0.77 (0.67-0.88)                        | 0.71 (0.62-0.81)                                       | 0.74 (0.65-0.85)                                | 0.74 (0.65-0.85)                                                                      |
| Health professionals (22)                                                         | 1.03 (0.9-1.19)               | 1.33 (1.15-1.54)                        | 1.3 (1.13-1.51)                                        | 1.29 (1.11-1.49)                                | 1.27 (1.09-1.46)                                                                      |
| Leisure, travel and related personal service occupations (62)                     | 0.91 (0.78-1.06)              | 1.11 (0.95-1.3)                         | 1.06 (0.9-1.24)                                        | 1 (0.85-1.18)                                   | 0.98 (0.84-1.16)                                                                      |
| Mobile machine and other drivers (82)                                             | 0.98 (0.82-1.16)              | 0.92 (0.77-1.1)                         | 0.86 (0.72-1.03)                                       | 0.87 (0.73-1.04)                                | 0.86 (0.72-1.03)                                                                      |
| Other managers and proprietors (12)                                               | 1.09 (0.96-1.24)              | 1.15 (1.01-1.3)                         | 1.11 (0.98-1.26)                                       | 1.09 (0.96-1.25)                                | 1.1 (0.97-1.25)                                                                       |
| Protective service occupations (33)                                               | 0.79 (0.65-0.95)              | 0.76 (0.63-0.93)                        | 0.74 (0.61-0.9)                                        | 0.79 (0.65-0.96)                                | 0.79 (0.65-0.96)                                                                      |

|                                                                                               |                  |                  |                  |                  |                  |
|-----------------------------------------------------------------------------------------------|------------------|------------------|------------------|------------------|------------------|
| Sales occupations (71)                                                                        | 1.01 (0.89-1.14) | 1.26 (1.11-1.43) | 1.19 (1.05-1.36) | 1.19 (1.05-1.36) | 1.17 (1.03-1.33) |
| Science, engineering and technology associate professionals (31)                              | 0.85 (0.68-1.05) | 0.9 (0.72-1.11)  | 0.88 (0.71-1.09) | 0.89 (0.72-1.11) | 0.87 (0.7-1.08)  |
| Science, research, engineering and technology professionals (21)                              | 0.76 (0.65-0.89) | 0.77 (0.66-0.9)  | 0.77 (0.66-0.9)  | 0.76 (0.65-0.89) | 0.75 (0.64-0.89) |
| Secretarial and related occupations (42)                                                      | 0.68 (0.57-0.82) | 0.94 (0.78-1.13) | 0.92 (0.76-1.11) | 0.88 (0.73-1.07) | 0.86 (0.71-1.04) |
| Skilled agricultural and related trades (51)                                                  | 0.48 (0.39-0.6)  | 0.47 (0.38-0.58) | 0.45 (0.37-0.56) | 0.5 (0.4-0.62)   | 0.53 (0.43-0.66) |
| Skilled construction and building trades (53)                                                 | 0.63 (0.55-0.71) | 0.59 (0.52-0.67) | 0.56 (0.5-0.64)  | 0.55 (0.49-0.63) | 0.55 (0.48-0.62) |
| Skilled metal, electrical and electronic trades (52)                                          | 0.82 (0.73-0.93) | 0.77 (0.68-0.87) | 0.73 (0.65-0.83) | 0.76 (0.67-0.86) | 0.75 (0.66-0.85) |
| Teaching and educational professionals (23)                                                   | 0.8 (0.68-0.93)  | 0.96 (0.82-1.13) | 0.95 (0.81-1.12) | 0.94 (0.8-1.1)   | 0.92 (0.79-1.09) |
| Textiles, printing and other (excluding food preparation and hospitality) skilled trades (54) | 0.93 (0.76-1.14) | 0.94 (0.77-1.15) | 0.89 (0.73-1.1)  | 0.88 (0.72-1.08) | 0.87 (0.71-1.07) |
| Caring personal services (614)                                                                | 1.23 (1.05-1.45) | 1.56 (1.32-1.83) | 1.47 (1.25-1.73) | 1.47 (1.24-1.74) | 1.44 (1.22-1.7)  |
| Elementary administration occupations (921)                                                   | 1.29 (1.06-1.57) | 1.27 (1.04-1.54) | 1.21 (0.99-1.47) | 1.16 (0.95-1.41) | 1.12 (0.92-1.37) |
| Elementary cleaning occupations (excluding cleaners and domestics) (923)                      | 0.66 (0.52-0.84) | 0.65 (0.51-0.84) | 0.61 (0.48-0.77) | 0.6 (0.47-0.76)  | 0.59 (0.46-0.75) |
| Elementary security occupations (924)                                                         | 1.52 (1.32-1.76) | 1.56 (1.35-1.81) | 1.45 (1.25-1.68) | 1.33 (1.15-1.55) | 1.3 (1.12-1.51)  |
| Food preparation and hospitality trades (543)                                                 | 0.97 (0.84-1.12) | 1.07 (0.92-1.23) | 1 (0.87-1.16)    | 0.98 (0.85-1.14) | 0.97 (0.84-1.12) |
| Other elementary occupations (927)                                                            | 0.84 (0.71-0.99) | 1.04 (0.88-1.23) | 0.97 (0.82-1.14) | 0.96 (0.81-1.13) | 0.94 (0.79-1.11) |
| Plant and machine operatives (812)                                                            | 0.82 (0.68-0.99) | 0.79 (0.65-0.95) | 0.74 (0.61-0.89) | 0.81 (0.67-0.98) | 0.79 (0.65-0.96) |

|                                                       |                  |                  |                  |                  |                  |
|-------------------------------------------------------|------------------|------------------|------------------|------------------|------------------|
| Process operatives (811)                              | 1.37 (1.13-1.65) | 1.37 (1.14-1.65) | 1.27 (1.05-1.53) | 1.35 (1.11-1.63) | 1.33 (1.1-1.61)  |
| Bus and coach drivers (8213)                          | 2.01 (1.66-2.44) | 1.84 (1.51-2.23) | 1.71 (1.41-2.08) | 1.66 (1.36-2.01) | 1.63 (1.34-1.98) |
| Care workers and home carers (6145)                   | 1.15 (1.02-1.29) | 1.51 (1.33-1.71) | 1.41 (1.24-1.6)  | 1.44 (1.27-1.63) | 1.42 (1.25-1.61) |
| Cleaners and domestics (9233)                         | 0.89 (0.76-1.04) | 1.11 (0.95-1.3)  | 1.02 (0.88-1.2)  | 1.01 (0.87-1.19) | 1 (0.85-1.17)    |
| Elementary storage occupations (9260)                 | 0.9 (0.77-1.06)  | 0.92 (0.78-1.08) | 0.86 (0.73-1.01) | 0.88 (0.75-1.04) | 0.87 (0.74-1.02) |
| Large goods vehicle drivers (8211)                    | 1.01 (0.86-1.18) | 0.91 (0.78-1.07) | 0.88 (0.75-1.03) | 0.92 (0.78-1.08) | 0.92 (0.79-1.08) |
| Managers and directors in retail and wholesale (1190) | 1.17 (0.95-1.43) | 1.34 (1.09-1.65) | 1.31 (1.06-1.61) | 1.28 (1.04-1.58) | 1.27 (1.03-1.56) |
| Taxi and cab drivers and chauffeurs (8214)            | 2.87 (2.48-3.32) | 2.63 (2.27-3.05) | 2.46 (2.12-2.85) | 2.25 (1.93-2.61) | 2.18 (1.88-2.53) |
| Van drivers (8212)                                    | 1.13 (0.96-1.33) | 1.07 (0.91-1.27) | 1.01 (0.86-1.2)  | 1 (0.85-1.19)    | 0.99 (0.83-1.17) |

Source: ONS; n.b. Reference group is Corporate Managers (excluding Retail)
